# Supplementary material for: Molecular signatures in systemic lupus erythematosus: distinction between disease flare and infection
Source: PubMed Central journal article supplement — Lupus Sci Med. 2016 Nov 10;3(1):e000159. doi: 10.1136/lupus-2016-000159 (PMC5133406; doi:10.1136/lupus-2016-000159), 2016-11-10

Supplemental Figure 1. Eight differentially expressed genes stratified by outcome group; SLE flare (n=11), SLE infection (n=12), SLE both infection and flare (n=4). P values are denoted as follows: \* p<0.05, \*\* p<0.001, \*\*\* p<0.0001.

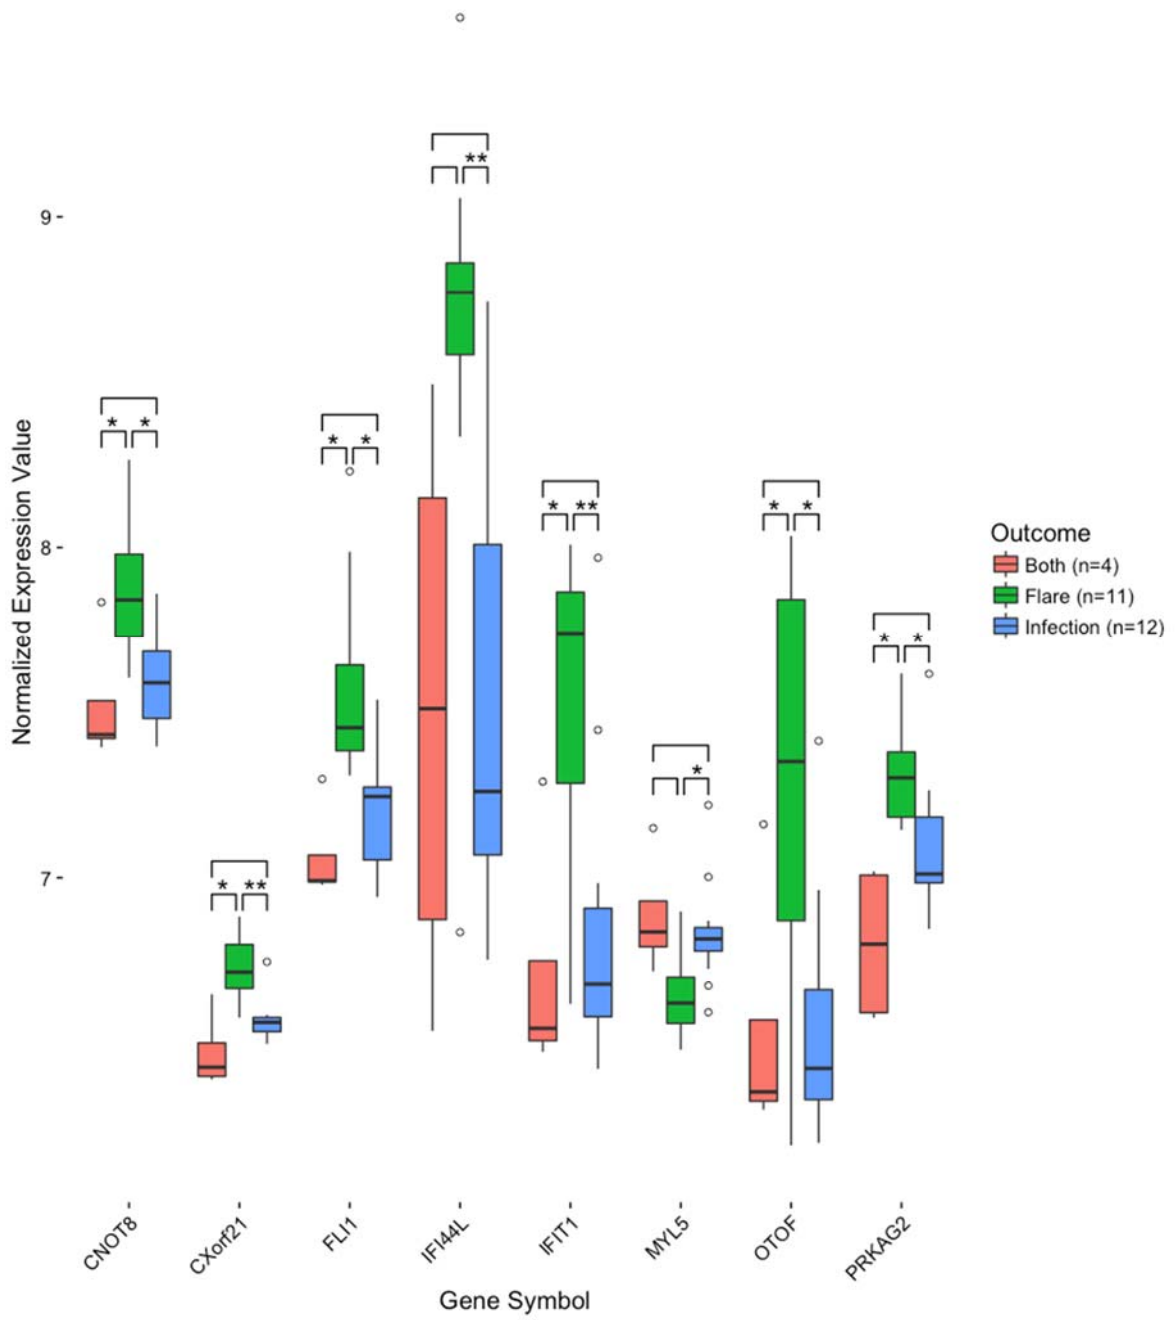

Supplemental Figure 2. Fli-1 expression in lupus nephritis. Fli-1 is upregulated in SLE subjects with active lupus nephritis (n=7) compared to SLE subjects without nephritis (n=8) (p=0.022).

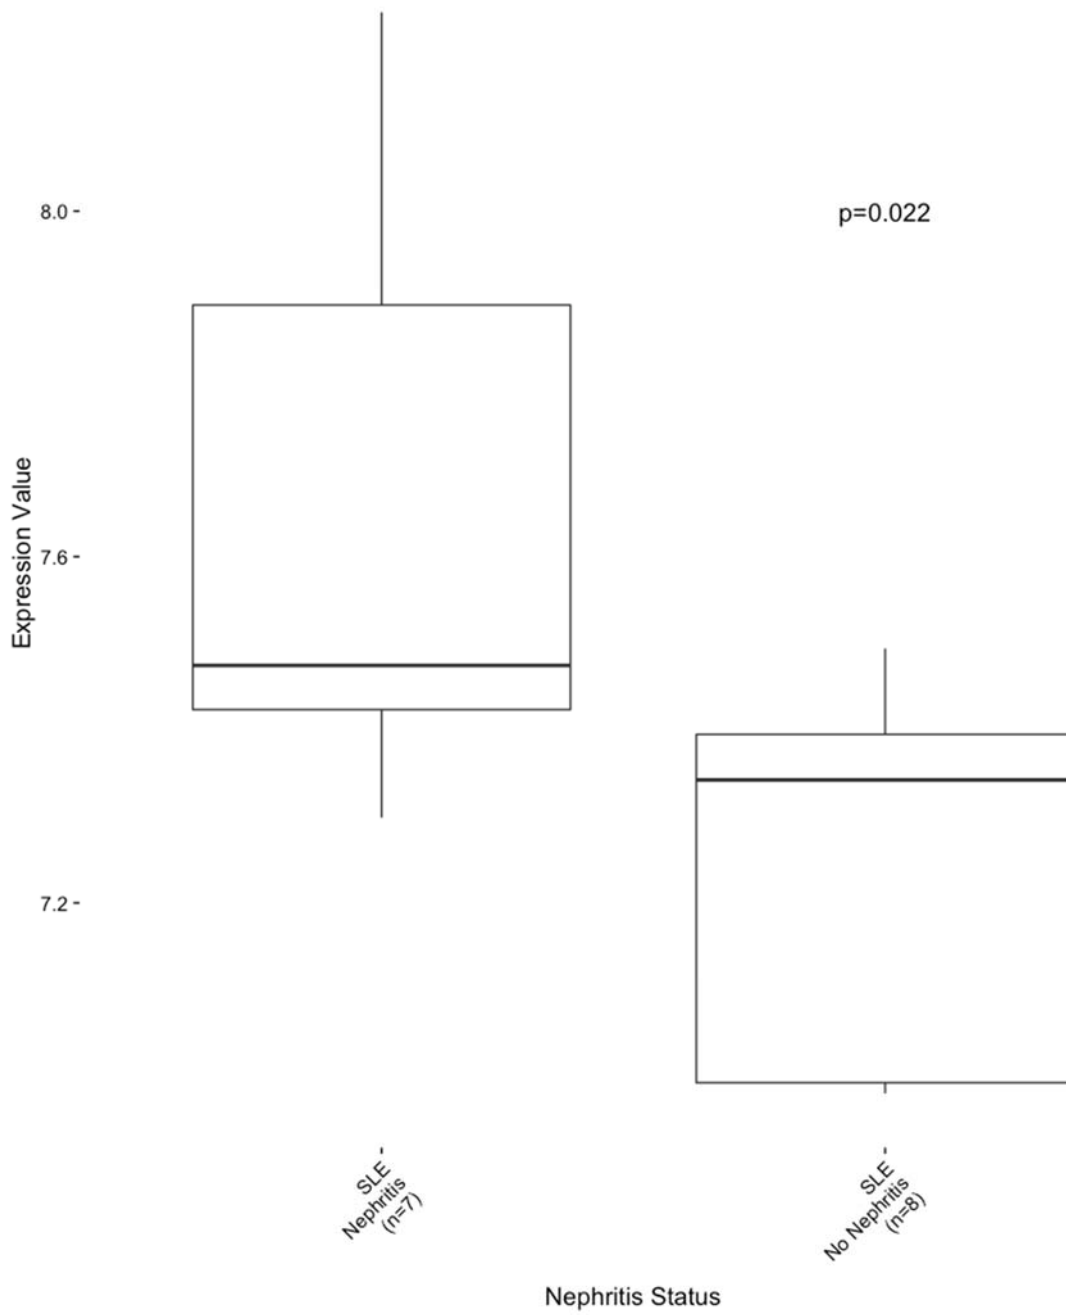

Supplemental Figure 3. Heatmap of IFN inducible genes (modified from Baechler et al. (16) in healthy controls, inactive SLE, SLE-infection and SLE-flare.

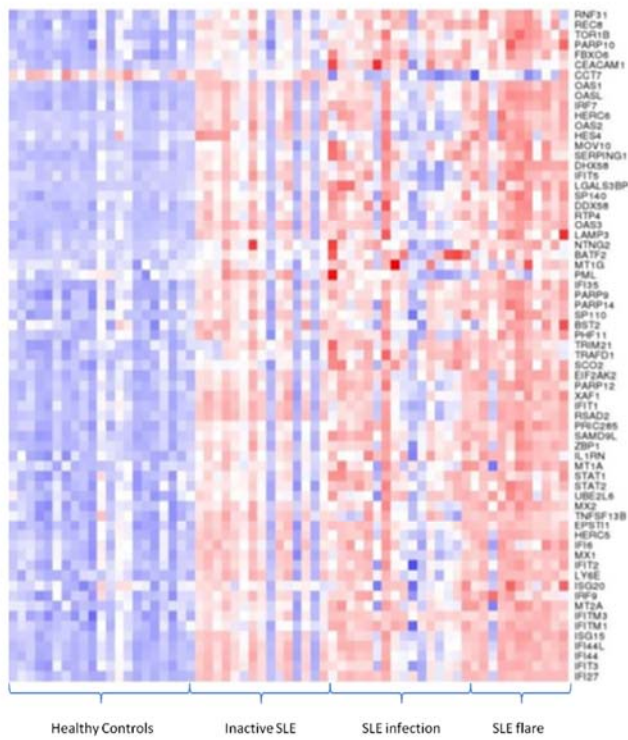

Supplement: lupus-2016-000159suppl_figures.pdf [file lupus-2016-000159suppl_figures.pdf]
